# Supplementary material
Source: MDPI journal article supplement (https://www.mdpi.com/2073-4344/9/6/536)
Supplement: s1 [file s1]

# Supplementary Materials: Cu modified Pt Nanoflowers with Preferential (100) Surfaces for Selective Electroreduction of Nitrate

Ting Chen <sup>1,\*</sup>, Yuxuan Li <sup>1</sup>, Luyan Li <sup>1</sup>, Yanjie Zhao <sup>1</sup>, Shuhua Shi <sup>1</sup>, Rongyan Jiang <sup>2</sup> and Houyi Ma <sup>3,\*</sup>

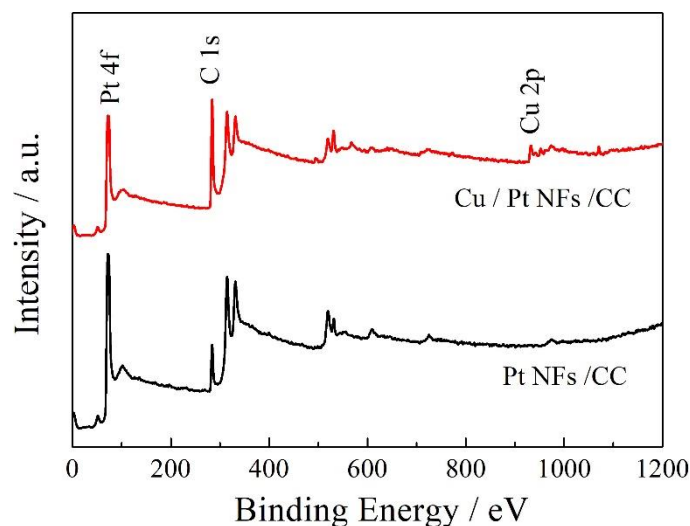

**Figure S1.** XPS survey spectra of Pt NFs / CC and Cu / Pt NFs / CC.

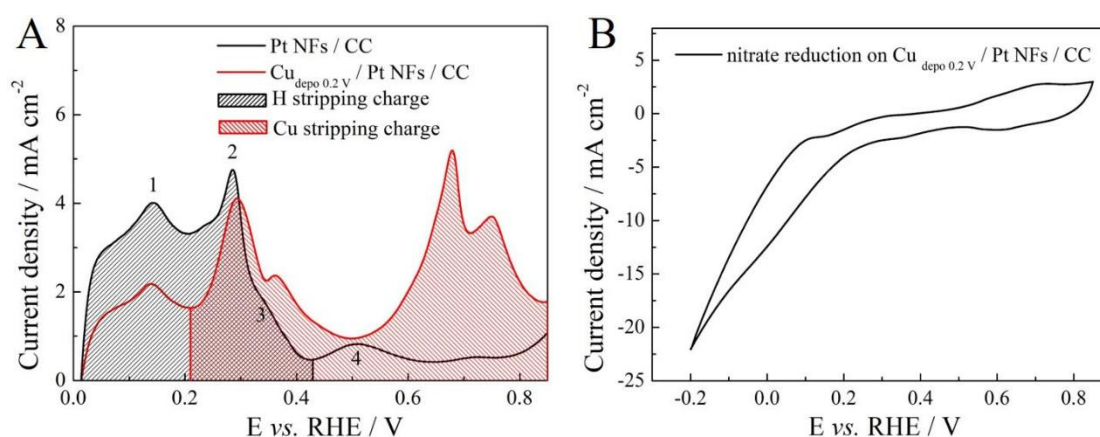

**Figure S2.** (A) H stripping curve of Pt NFs / CC (blank curve) and Cu stripping curve of  $\text{Cu}_{\text{depo } 0.2 \text{ V}}$  / Pt NFs / CC (red curve) in 0.5 M  $\text{H}_2\text{SO}_4$ , (B) CVs of  $\text{Cu}_{\text{depo } 0.2 \text{ V}}$  / Pt NFs / CC in 0.1 M NaOH containing 20 mM  $\text{NO}_3^-$ . Scan rate is 20  $\text{mV s}^{-1}$ .

In order to demonstrate the effect of Cu coverage of Cu modified Pt NFs on nitrate reduction,  $\text{Cu}_{\text{depo } 0.2 \text{ V}}$  / Pt NFs / CC was prepared by carrying out the Cu deposition potential of 0.2 V for 300 s for Cu modification on Pt NFs / CC. Different from the Cu / Pt NFs / CC, the bulk Cu are covered on the surface of Pt NFs [1,2]. As shown in Figure S2A, hydrogen adsorption on the Pt(110) step sites remains ca. 0.14 V with a diminution of the current density but the peaks for the hydrogen adsorption on the Pt(100) step sites and terraces disappear compared to the bare Pt NFs / CC, indicating that Cu atoms are totally covered on the surface of Pt(100) with the coverage of ca. 65.8% (calculated from the H desorption charge and Cu stripping charge by integrating the shaded areas depicted in Figure S2A). Not surprisingly,  $\text{Cu}_{\text{depo } 0.2 \text{ V}}$  / Pt NFs / CC displays a lower activity for nitrate reduction which

caused by the bulk Cu deposited on Pt NFs, and no N<sub>2</sub> selective behavior is observed from the CVs in Figure S2B.

## Reference

1. Danilov, A.I.; Molodkina, E.B.; Polukarov, Yu.M.; Climent, V.; Feliu, J.M. Active centers for Cu UPD–OPD in acid sulfate solution on Pt(111) electrodes. *Electrochim. Acta* **2001**, *46*, 3137–3145, doi: 10.1016/S0013-4686(01)00605-3.
2. Molodkina, E.B.; Ehrenburg, M.R.; Danilov, A.I.; Feliu, J.M. Two-dimensional Cu deposition on Pt(100) and stepped surfaces of platinum single crystals. *Electrochim. Acta* **2016**, *194*, 385–393, doi: 10.1016/j.electacta.2016.02.082.

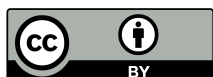

© 2018 by the authors. Submitted for possible open access publication under the terms and conditions of the Creative Commons Attribution (CC BY) license (<http://creativecommons.org/licenses/by/4.0/>).
